# Supplementary material for: Effect of Crystallinity on the Properties of Polycaprolactone Nanoparticles Containing the Dual FLAP/mPEGS-1 Inhibitor BRP-187
Source: MDPI journal article supplement (doi:10.3390/polym13152557), 2021-07-31
Supplement: s1 [file s1]

## Supporting information

### Effect of crystallinity on the properties of polycaprolactone nanoparticles containing the dual FLAP/mPEGS-1 inhibitor BRP-187-187

Antje Vollrath <sup>a,b</sup>, Christian Kretzer <sup>c</sup>, Bärbel Beringer-Siemers <sup>a</sup>, Blerina Shkodra <sup>a,b</sup>, Justyna A. Czaplewska <sup>a</sup>, Damiano Bandelli <sup>a,b</sup>, Steffi Stumpf <sup>a,b</sup>, Stephanie Hoepfener <sup>a,b</sup>, Christine Weber <sup>a,b</sup>, Oliver Werz <sup>b,c</sup>, Ulrich S. Schubert <sup>a,b</sup> \*

\* Corresponding author

<sup>a</sup>Laboratory of Organic Chemistry and Macromolecular Chemistry (IOMC)  
Friedrich Schiller University, Humboldtstraße 10, 07743 Jena, Germany

<sup>b</sup>Jena Center for Soft Matter (JCSM)  
Friedrich Schiller University, Philosophenweg 7, 07743 Jena, Germany

<sup>c</sup>Department of Pharmaceutical/Medicinal Chemistry, Institute of Pharmacy  
Friedrich Schiller University, Philosophenweg 14, 07743 Jena, Germany

**Table S1.** Molar mass and composition of the (co)polyesters. Details are described in a previous publication.<sup>[1]</sup>

| $\epsilon\text{CL}/\delta\text{CL}^{\text{a}}$<br>(mol %) | $M_{\text{n, theo}}^{\text{b}}$<br>(kg mol <sup>-1</sup> ) | $M_{\text{n, NMR}}^{\text{a}}$<br>(kg mol <sup>-1</sup> ) | $M_{\text{n, SEC}}^{\text{c}}$<br>(kg mol <sup>-1</sup> ) | $D_{\text{SEC}}^{\text{c}}$ |
|-----------------------------------------------------------|------------------------------------------------------------|-----------------------------------------------------------|-----------------------------------------------------------|-----------------------------|
| 100/0                                                     | 11                                                         | 13                                                        | 19                                                        | 1.17                        |
| 87/13                                                     | 9                                                          | 13                                                        | 21                                                        | 1.57                        |
| 81/19                                                     | 9                                                          | 10                                                        | 19                                                        | 1.41                        |
| 75/25                                                     | 8                                                          | 10                                                        | 19                                                        | 1.30                        |
| 61/39                                                     | 7                                                          | 9                                                         | 16                                                        | 1.26                        |
| 45/55                                                     | 7                                                          | 7                                                         | 15                                                        | 1.21                        |
| 0/100                                                     | 10                                                         | 9                                                         | 6                                                         | 1.09                        |

(a) Determined by <sup>1</sup>H-NMR spectroscopy of the purified polymers.

(b) Molar mass expected from monomer conversions and the feed ratio.

(c) Determined by size exclusion chromatography (eluent CHCl<sub>3</sub>, refractive index detection, polystyrene calibration).

## Supporting information

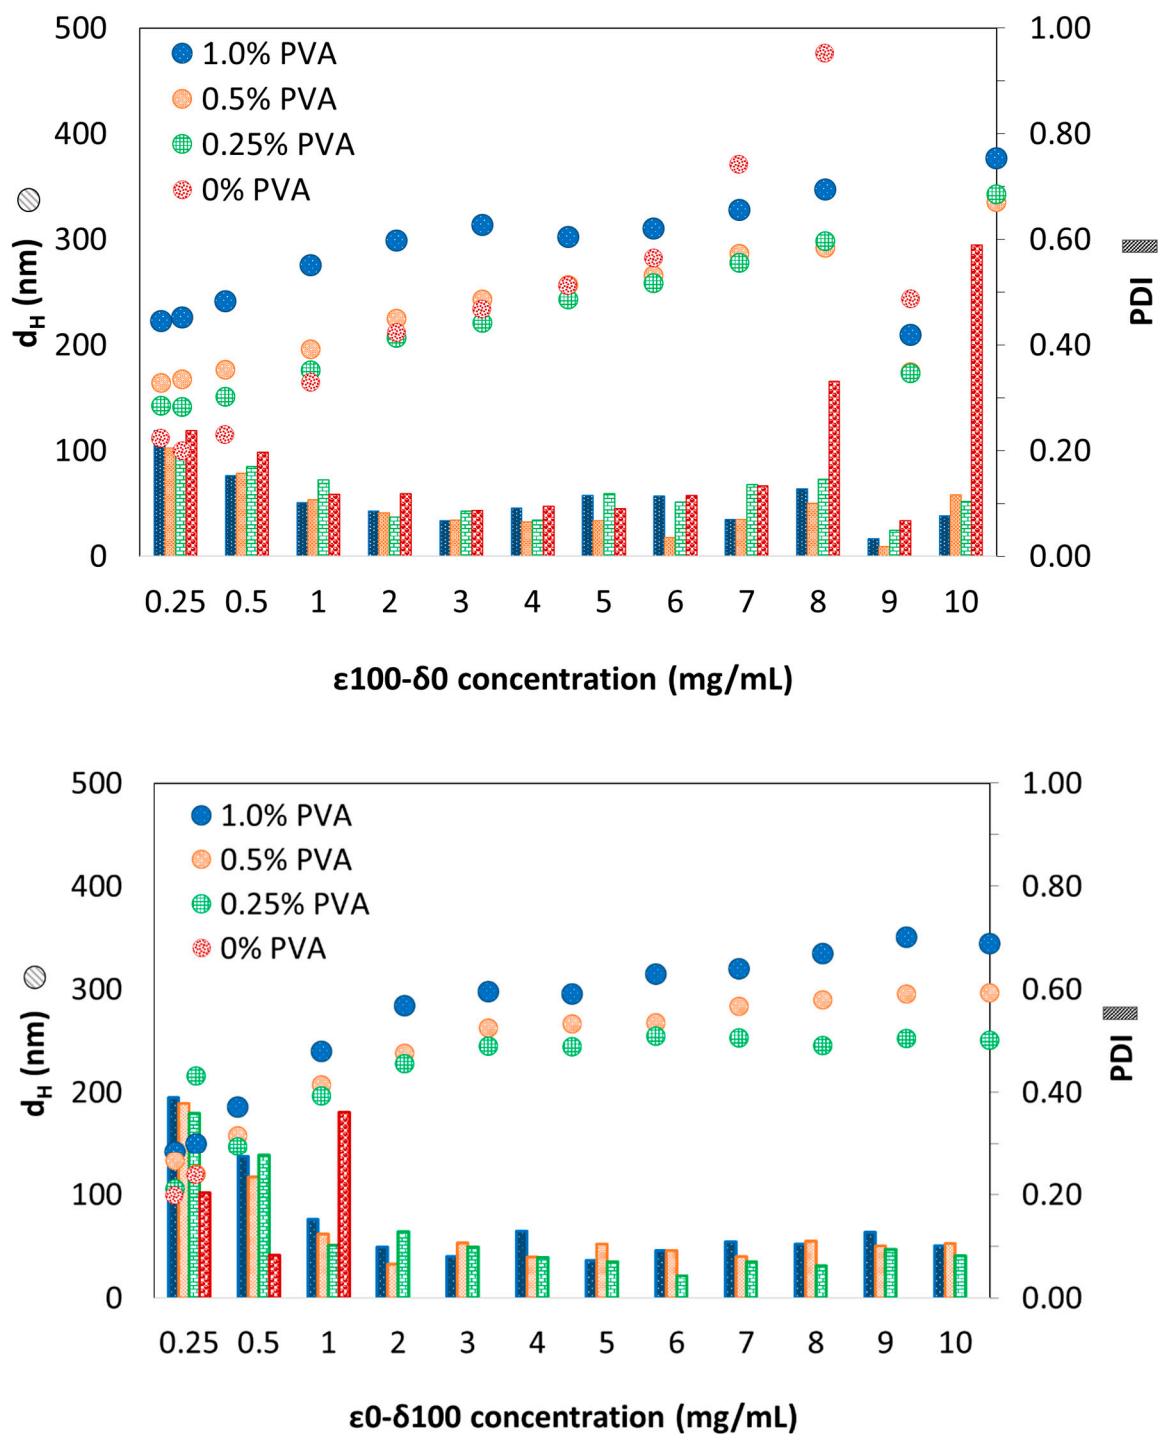

**Figure S1.** Hydrodynamic diameter (intensity-weighted distribution, circles) and PDI (bars) of the homopolymer  $\epsilon 100\text{-}\delta 0$  and  $\epsilon 0\text{-}\delta 100$  NPs over a range of PVA concentration used in the formulation.

## Supporting information

**Table S2.** Properties of PCL[BRP-187] NPs formulated from THF utilizing polymer concentration of 5 mg mL<sup>-1</sup> (n = 1 batch).

| $\epsilon$ CL/ $\delta$ CL<br>(mol %) | Purified NPs <sup>a</sup> |      | Lyophilized NPs <sup>b</sup> |      | PVA <sup>d</sup><br>(%, w/w) | Yield <sup>e</sup><br>(%) |
|---------------------------------------|---------------------------|------|------------------------------|------|------------------------------|---------------------------|
|                                       | $d_H$ (nm)                | PDI  | $d_H$ (nm)                   | PDI  |                              |                           |
| $\epsilon$ 100- $\delta$ 0            | 593                       | 0.52 | 461                          | 0.40 | 2.00                         | 97                        |
| $\epsilon$ 87- $\delta$ 13            | 427                       | 0.23 | 349                          | 0.30 | 2.01                         | 86                        |
| $\epsilon$ 81- $\delta$ 19            | 445                       | 0.24 | 465                          | 0.33 | 1.82                         | 99                        |
| $\epsilon$ 75- $\delta$ 25            | 421                       | 0.28 | 651                          | 0.62 | 1.88                         | 95                        |
| $\epsilon$ 61- $\delta$ 39            | 407                       | 0.19 | 443                          | 0.40 | 1.63                         | 76                        |
| $\epsilon$ 45- $\delta$ 55            | 397                       | 0.26 | 414                          | 0.36 | 2.26                         | 60                        |
| $\epsilon$ 0- $\delta$ 100            | 403                       | 0.49 | 436                          | 0.49 | 1.66                         | 53                        |

$d_H$  represents the intensity-weighted distribution.

(a) NPs measured after purification.

(b) NPs measured after lyophilization and subsequent resuspension in water.

(c) Determined by UV-VIS spectroscopy at  $\lambda = 316$  nm (n = 4) and calculated using  $LC = (\text{mass of drug recovered}) / (\text{mass of particle recovered}) \times 100$ .

(d) The determination of PVA in the NPs (%, w/w) was performed according to the published protocol.<sup>[15]</sup>(e)

Yield = (mass of NPs recovered including PVA residue) / (mass of polymer + mass of drug) in the formulation  $\times 100$ .

**Table S3.** Particle properties of empty PCL NPs prepared in THF with c = 2.5 mg mL<sup>-1</sup> (n = 2 batches) obtained by DLS and ELS measurements after purification and after lyophilization and subsequent resuspension (n = 2 for purified NPs, n = 1 for lyophilized NPs).

| $\epsilon$ CL/ $\delta$ CL<br>(mol %) | Purified NPs <sup>a</sup> |      | Lyophilized NPs <sup>b</sup> |      | ZP <sup>b</sup><br>(mV) | PVA <sup>c</sup><br>(%, w/w) | Yield <sup>d</sup><br>(%) |
|---------------------------------------|---------------------------|------|------------------------------|------|-------------------------|------------------------------|---------------------------|
|                                       | $d_H$ (nm)                | PDI  | $d_H$ (nm)                   | PDI  |                         |                              |                           |
| $\epsilon$ 100- $\delta$ 0            | 250                       | 0.08 | 250                          | 0.21 | -33                     | 2.0                          | 93                        |
| $\epsilon$ 87- $\delta$ 13            | 177                       | 0.05 | 253                          | 0.27 | -23                     | 2.0                          | 68                        |
| $\epsilon$ 81- $\delta$ 19            | 193                       | 0.06 | 268                          | 0.28 | -38                     | 1.8                          | 70                        |
| $\epsilon$ 75- $\delta$ 25            | 196                       | 0.05 | 279                          | 0.33 | -32                     | 1.9                          | 76                        |
| $\epsilon$ 61- $\delta$ 39            | 170                       | 0.08 | 220                          | 0.21 | -13                     | 1.6                          | 54                        |
| $\epsilon$ 45- $\delta$ 55            | 163                       | 0.06 | 205                          | 0.23 | -33                     | 2.3                          | 51                        |
| $\epsilon$ 0- $\delta$ 100            | 212                       | 0.08 | 285                          | 0.30 | -40                     | 1.7                          | 67                        |

$d_H$  represents the intensity-weighted distribution (five measurements) and zeta-potential (ZP) (three measurements).

(a) NPs measured after purification.

(b) NPs measured after lyophilization and subsequent resuspension in water.

(c) The determination of PVA in the NPs (%, w/w) was performed according to the published protocol.<sup>[15]</sup>

(d) Yield = (mass of NPs recovered – mass of found PVA) / (mass of polymer + mass of drug) in the formulation  $\times 100$ .

# Supporting information

**Table S4.** DLS intensity-weighted size distribution of PCL[BRP-187] NPs of one formulation round after purification, as well as after lyophilization and resuspension in water.

| $\epsilon$ CL/ $\delta$ CL | After purification | After lyophilization & resuspension |
|----------------------------|--------------------|-------------------------------------|
| $\epsilon$ 100- $\delta$ 0 |                    |                                     |
| $\epsilon$ 87- $\delta$ 13 |                    |                                     |
| $\epsilon$ 81- $\delta$ 19 |                    |                                     |
| $\epsilon$ 75- $\delta$ 25 |                    |                                     |

# Supporting information

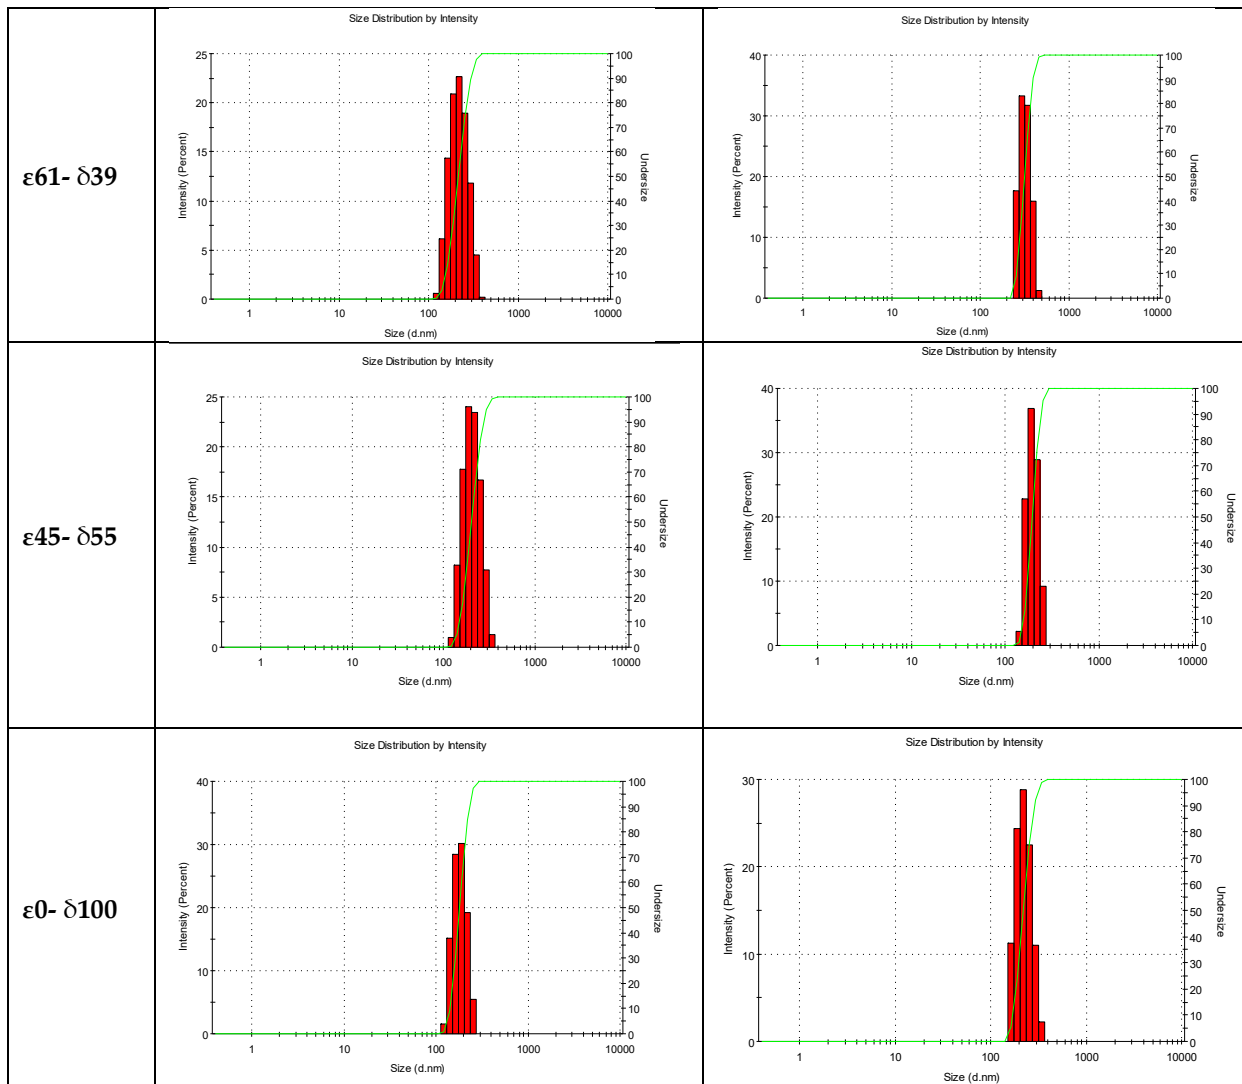

## Supporting information

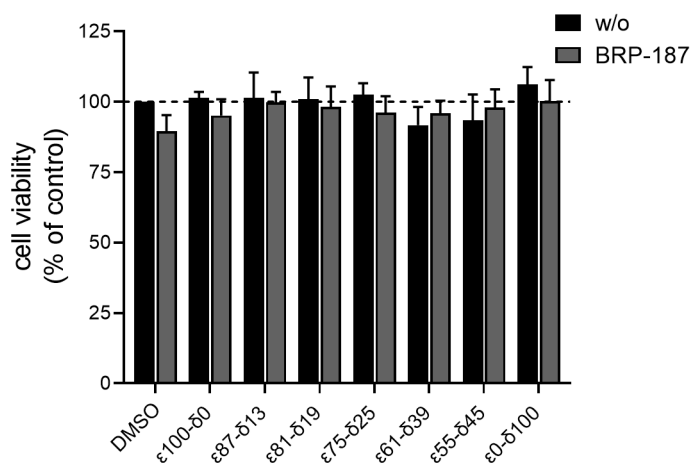

**Figure S2.** Cell viability measured with a Beckman ViCell XR cell counter by trypan blue staining. A total of  $1 \times 10^7$  PMNL were diluted in PBS plus 0.1% of glucose and incubated with DMSO, BRP-187 (10  $\mu$ M), empty PCL particles (labeled as w/o) or PCL particles with BRP-187 (labeled with BRP-187; respective amount to 10  $\mu$ M BRP-187) for 5 h at 37 °C. Values are given as 5-LO products as a percentage of control (DMSO) (n = 3).

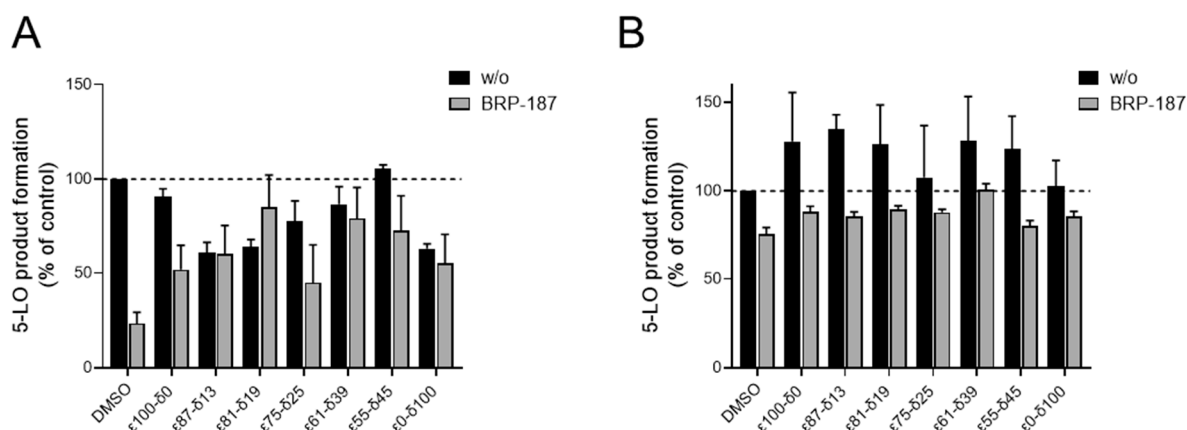

**Figure S3.** Measurement of 5-LO product formation as indicator for the inhibition of the drug target 5-lipoxygenase-activating protein (FLAP) by BRP-187.<sup>[37]</sup> A total of  $5 \times 10^6$  polymorphonuclear leukocytes (PMNL) diluted in PBS containing 0.1% glucose and 1mM  $\text{CaCl}_2$  were preincubated with DMSO, BRP-187 (0.3  $\mu$ M), empty PCL particles (labeled as w/o) or PCL particles with BRP-187 (labeled as BRP-187; 0.3  $\mu$ M respective BRP-187) for 1 h (A) and 2 h (B) at 37 °C and further stimulated with 2.5  $\mu$ M A23187 for 10 min. The reaction was stopped with 1 mL ice-cold methanol containing 200 ng  $\text{mL}^{-1}$  PGB1 as internal standard. Lipid mediators were extracted via solid-phase extraction (SPE) and analyzed with HPLC. Values are given as 5-LO products ( $\text{LTB}_4$ , its trans-isomers 4 and 5-HETE) as a percentage of control (DMSO) (n = 3).

## Supporting information

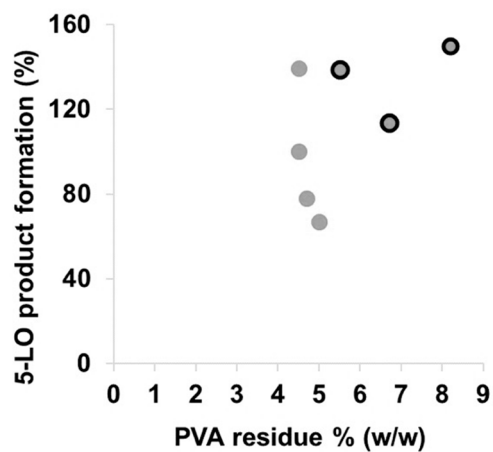

**Figure S4.** Influence of the residual PVA on the efficiency of drug-loaded PCL NPs on 5-LO inhibition. Black-circled data points represent PCL polymers with bulk degree of crystallinity below 10% and glass transition temperature  $T_g < 37$  °C.
